# Supplementary material
Source: publisher site journal article supplement (https://www.dovepress.com/article/333018)

**Supplementary materials**

Supplementary Figure 1. Map of the population migration from Wuhan to fourteen cities in Hubei Province.


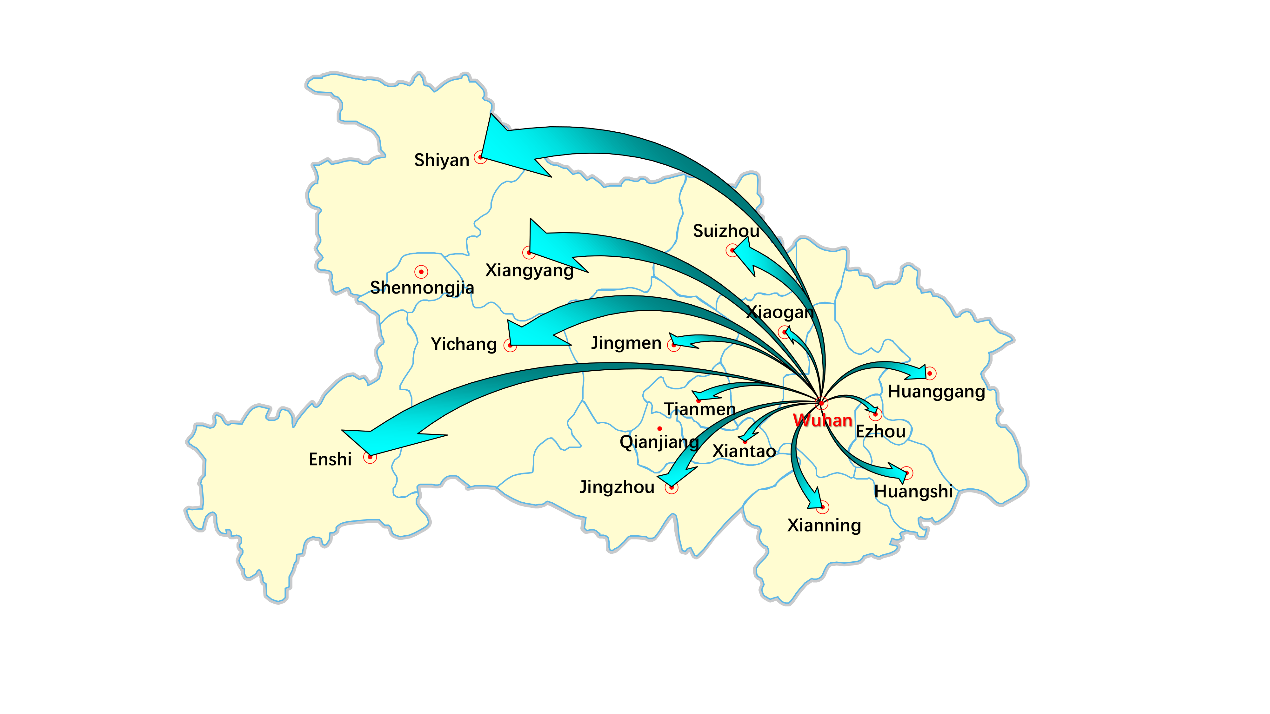


Supplementary Figure 2. Time frame for the inclusion of confirmed cases and population migration rates in fourteen cities.


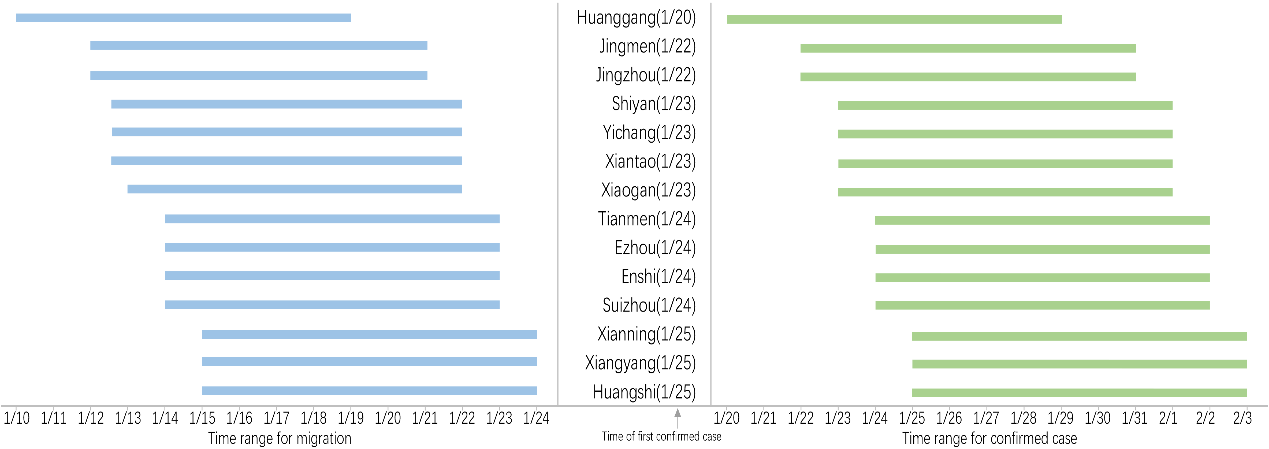


Supplementary Figure 3. The change of the number of confirmed cases in fourteen cities from January 20 to February 3, 2020.


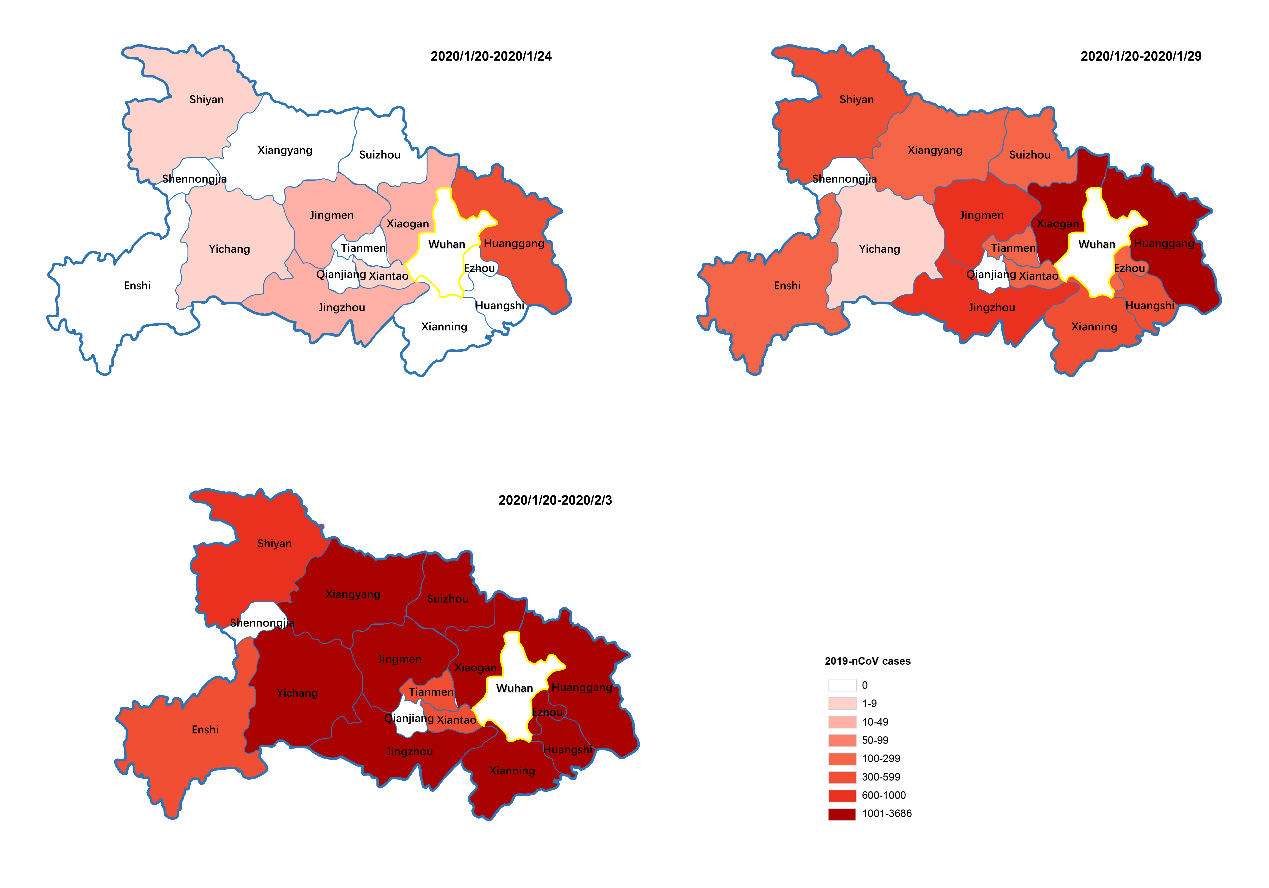


Supplementary Figure 4. Trend chart of the proportions of population migration from Wuhan and the number of confirmed cases in each of the fourteen cities. (The confirmed cases were collected from the 10 days after the first patient was confirmed. The proportions of the immigrated population were collected from the 10 days before the first patient was confirmed.)


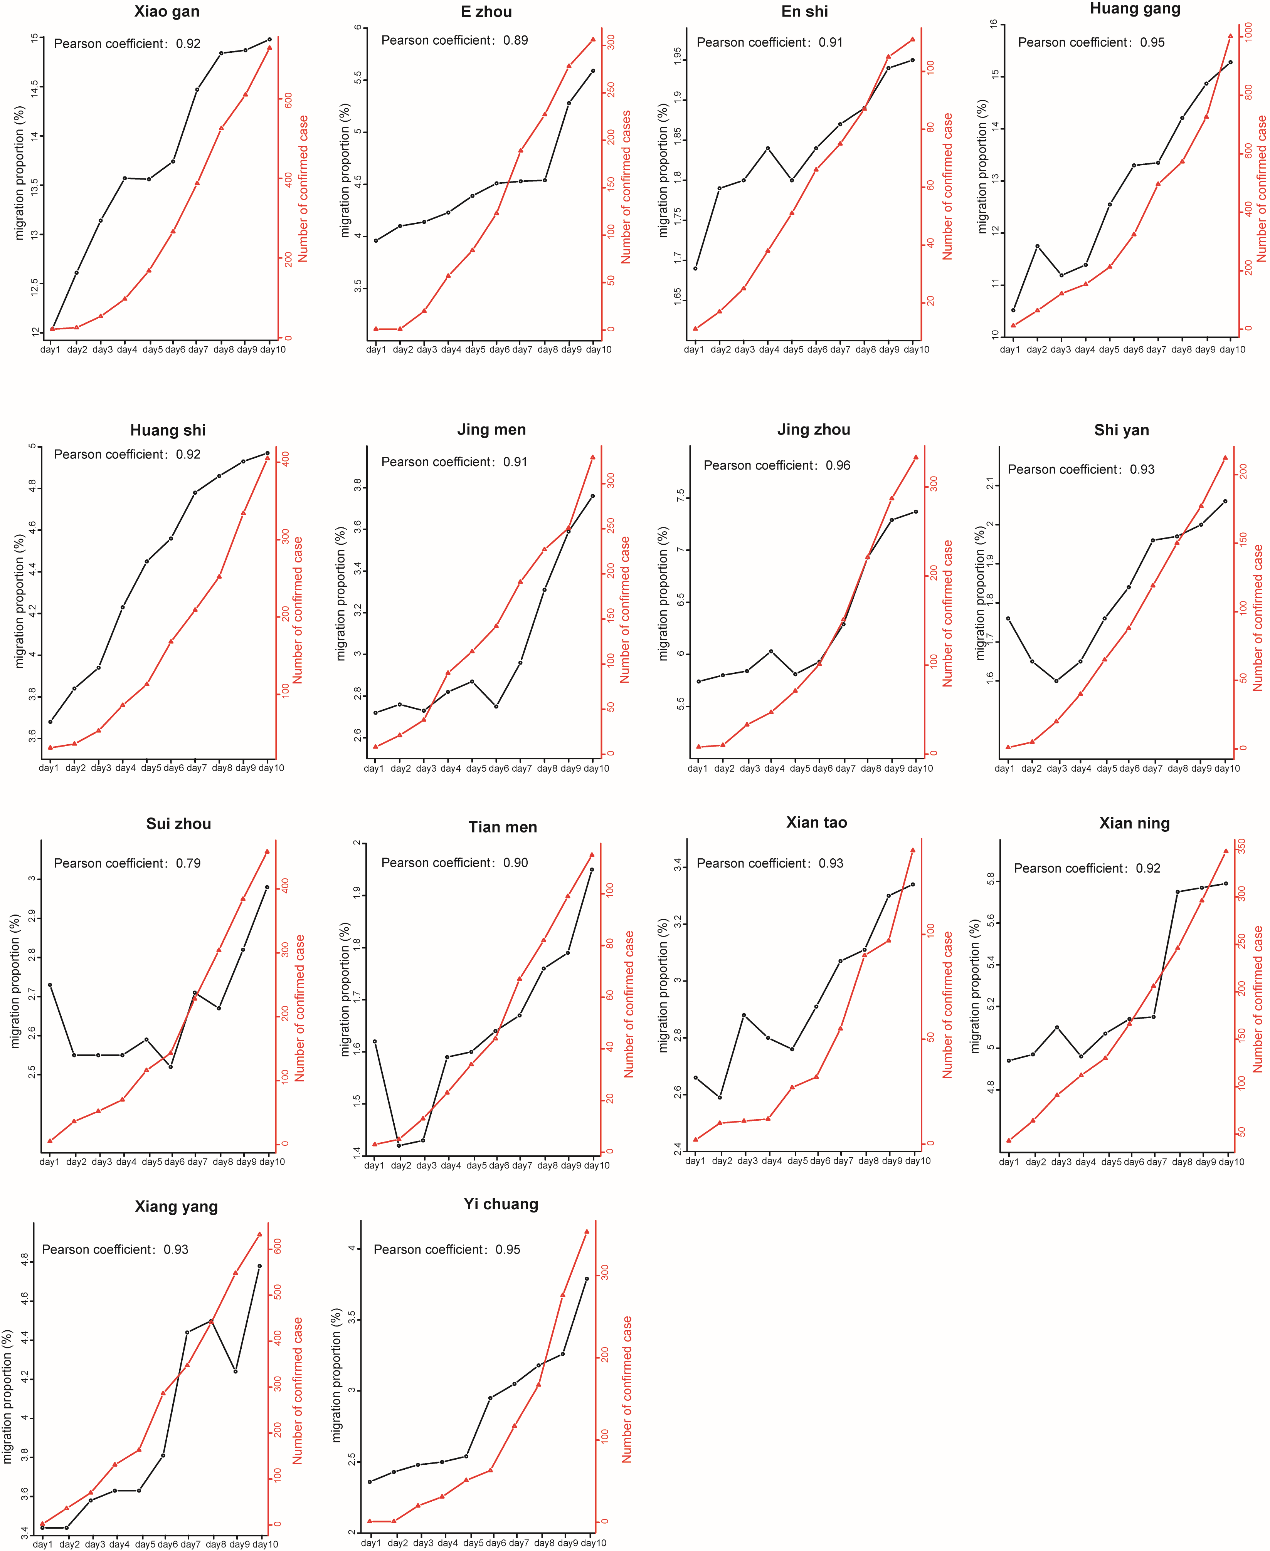


Supplementary Figure 5 The mathematical relationship between the proportion of population migration from Wuhan and the number of confirmed cases in each of the fourteen cities. (The confirmed cases were collected from the 10 days after the first patient was confirmed. The proportions of the immigrated population were collected from the 10 days before the first patient was confirmed.)


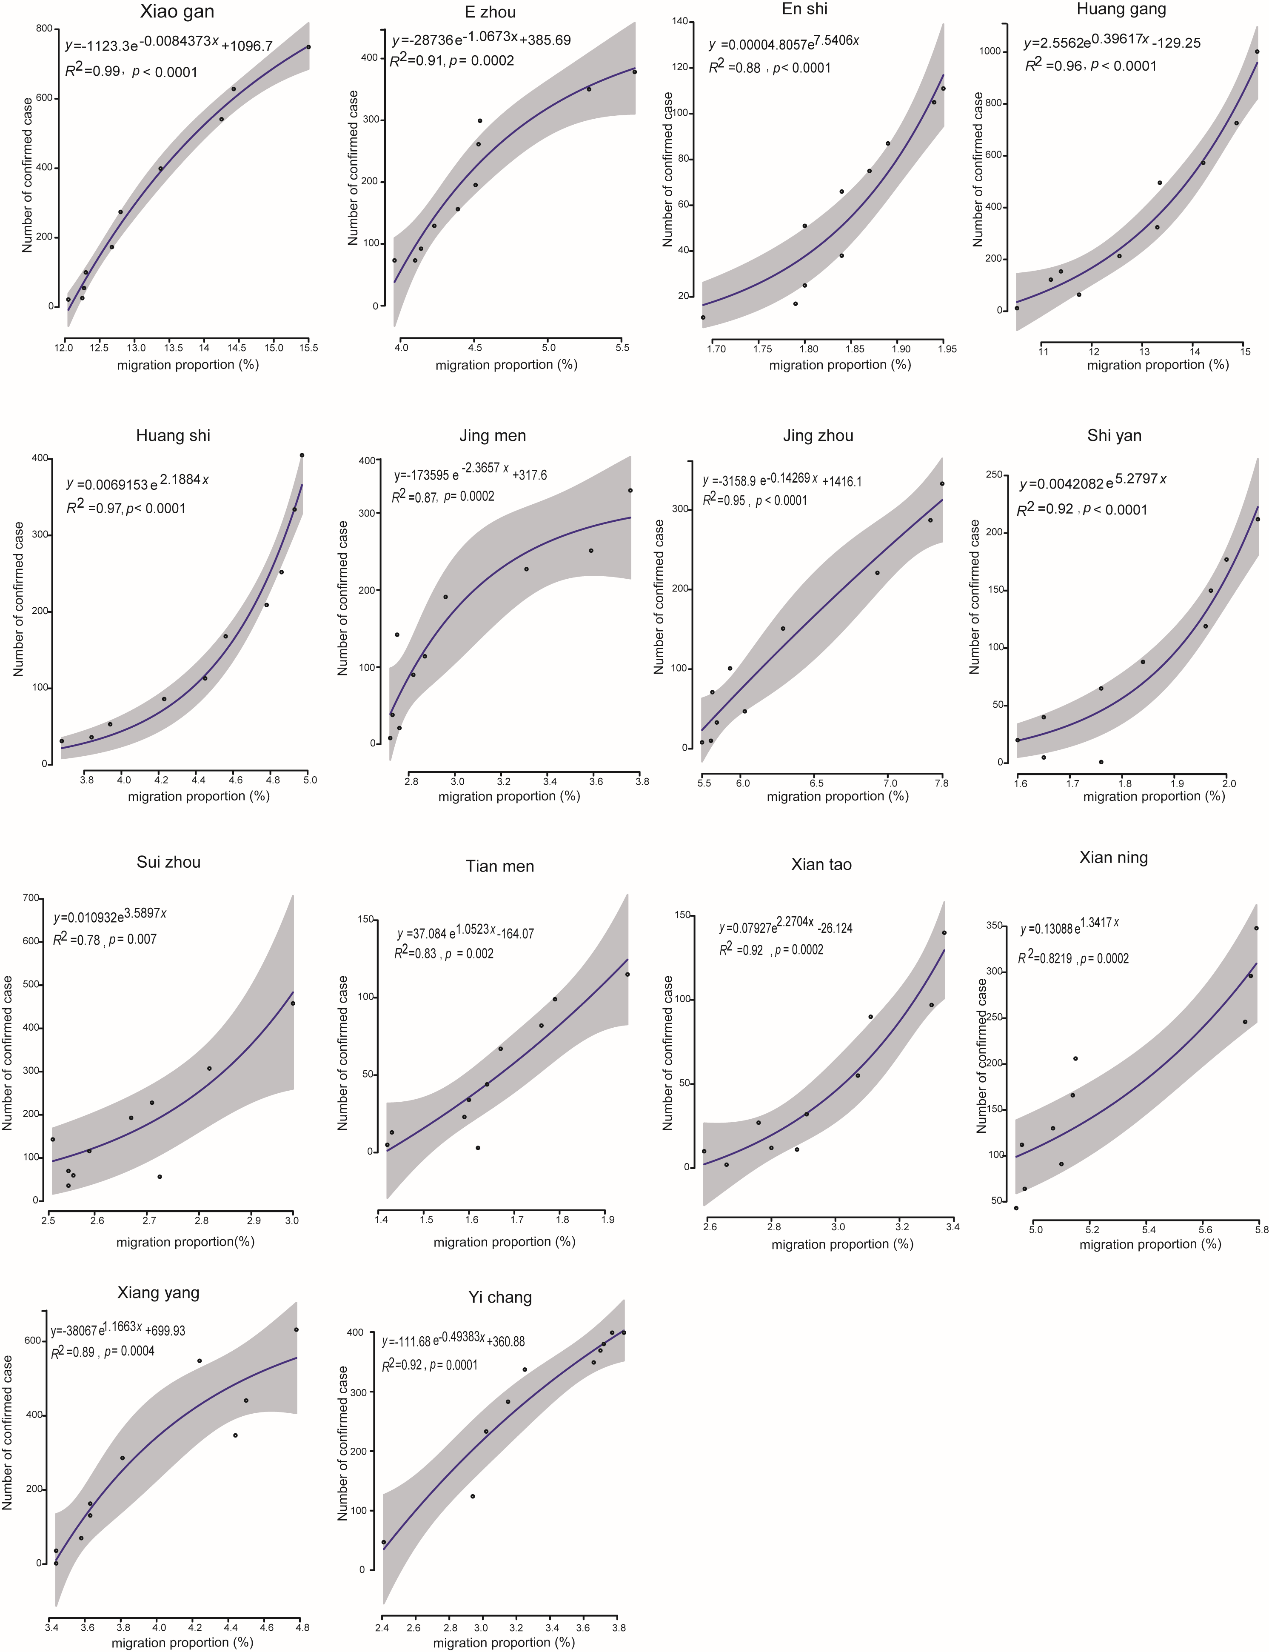

Supplement: Supplementary file 1 [file get_supplementary_file.php]
